# Supplementary material for: Kinetic grain growth in firn induced by meltwater infiltration on the Greenland Ice Sheet
Source: Copernicus journal article supplement (doi:10.5194/tc-19-6791-2025), 2025-12-16
Supplement: Supplementary file 1 [file tc-19-6791-2025-supplement.pdf]

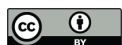

*Supplement of*

## **Kinetic grain growth in firn induced by meltwater infiltration on the Greenland Ice Sheet**

**Kirsten L. Gehl et al.**

*Correspondence to:* Kirsten L. Gehl ([kirsten.gehl3798@gmail.com](mailto:kirsten.gehl3798@gmail.com))

The copyright of individual parts of the supplement might differ from the article licence.

S1. Methods – Site-Specific Simulation

Microstructural properties ascribed to the site-specific simulation firn column are provided in Table S1.

Table S1: Initial microstructure parameters of the site-specific simulation firn column. Values are uniform across the entire profile initially.

| Parameter                                    | Value                                      |
|----------------------------------------------|--------------------------------------------|
| Grain radius, all layers (mm)                | 0.8†                                       |
| Bond radius, all layers (mm)                 | 0.25                                       |
| Dendricity, all layers                       | 0                                          |
| Sphericity, all layers                       | 0.5                                        |
| Microstructure parameter ('mk', categorical) | 1 (indicates that snow has become faceted) |

† A grain radius of 0.8mm produces firn grains with sizes slightly smaller than those reported by McDowell et al. (2023)

S2. Methods – Synthetic Simulations

Information regarding initial conditions and forcings for the two synthetic simulations are found in Table S2 and Figure S1.

Table S2: Firn profile initial conditions and meteorological forcings, spin-up period for synthetic simulations.

| Initial Conditions – Microstructure        | Value                                   |
|--------------------------------------------|-----------------------------------------|
| Grain radius (mm)                          | 0.75                                    |
| Bond radius (mm)                           | 0.5                                     |
| Dendricity                                 | 0 ('old' snow)                          |
| Sphericity                                 | 0.6                                     |
| Microstructure marker ('mk')               | 1 (meaning grains have become faceted') |
| Stress change rate                         | 0                                       |
| Site Information                           | Value                                   |
| Site altitude                              | 1998m                                   |
| Site coordinates                           | 69.872469, -47.036429                   |
| Meteorological Forcings                    | Value                                   |
| Shortwave radiation ( $\text{W m}^{-2}$ )  | 2                                       |
| Longwave radiation ( $\text{W m}^{-2}$ ) † | 300                                     |
| Precipitation ( $\text{m yr}^{-1}$ )       | 0.4-0.5, occuring randomly              |
| Windspeed ( $\text{m s}^{-1}$ )            | 3                                       |
| Wind direction                             | 20                                      |
| Relative humidity                          | 0.61                                    |

† A LWR value of  $300 \text{ W m}^{-2}$  was used as it allowed for the deep firn temperature profile at the end of the 50-year spin-up to become vertical at -16.5°C. Firn temperature profiles at CP-1998m (and at other sites along our study transect) are typically vertical at depth and reflect the MAAT at the site (-16.5°C) (Saito et al., 2024).

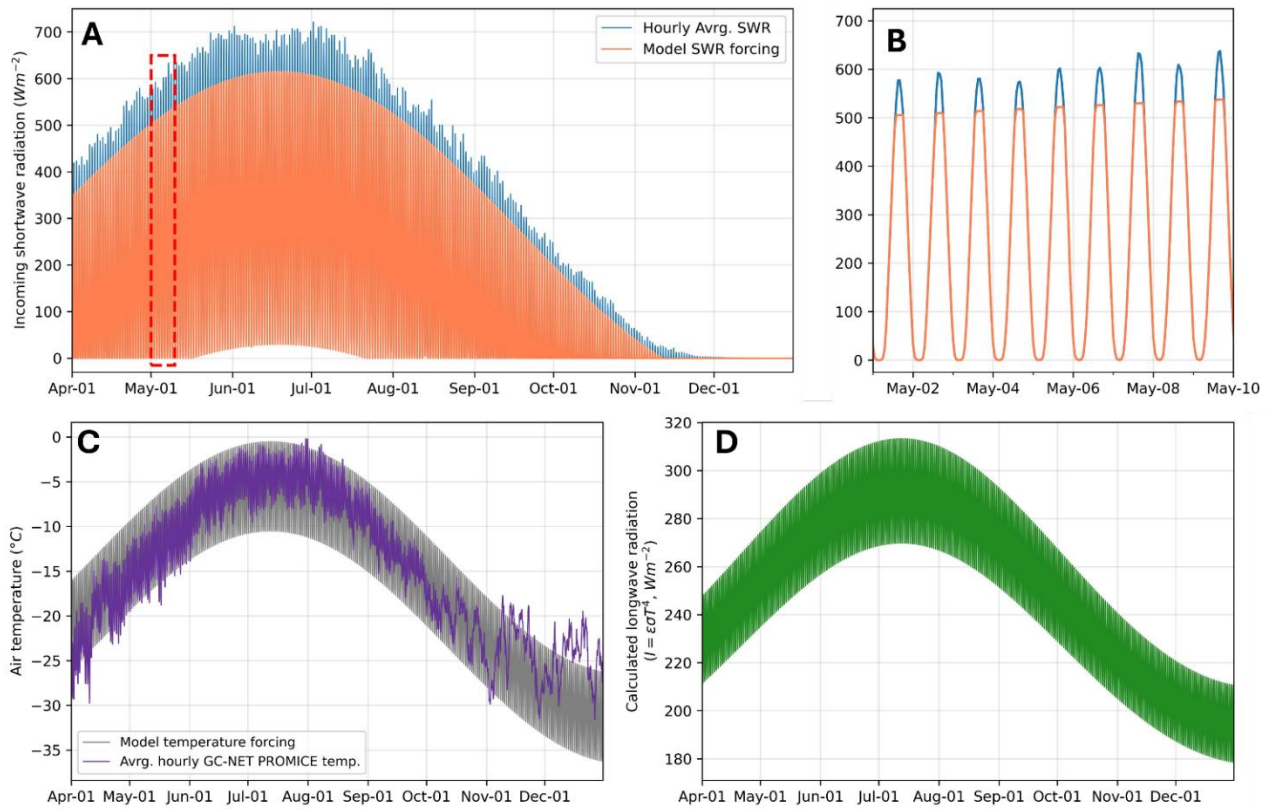

**Figure S1: Meteorological forcings employed in the synthetic Wetting Front and Preferential Flow (Piping) simulations. Forcings span from April 1<sup>st</sup> – December 31<sup>st</sup>.** A) Measured hourly average shortwave radiation values from 1995-2020 at the GC-NET PROMICE weather station, site CP-1998m (blue line). Model SWR forcings were created by trimming local maxima and minima with two envelopes (orange line). The data within the red dashed box are shown in B), a close-up of diurnal fluctuations in the shortwave radiation data/model forcing. C) Measured hourly average air temperature data from 1995-2020 (purple line), also from the CP-1998m weather station. Averages were fit with a sinusoid with a secondary, diurnally fluctuating sinusoid (grey line) to capture approximate air temperature fluctuations throughout the year. Using the sinusoidal air temperature forcings, we directly calculated longwave radiation (D) from temperature using the Stefan-Boltzmann Law.

S3. Results

Site-by-site characteristics, as well as overall site averages, of the two meltwater-induced faceting modes, wet layer onset and preferential flow/piping, are found in Table S3.

Table S3: Duration, timing, and depths of observed wet layer onset and preferential flow/piping Critical Temperature Gradients (CTGs,  $\geq|\pm 10|$  °C m<sup>-1</sup>) at various sites. Only those sites experiencing either form of CTG are included.

| Site I.D.          | Msrmt. year | Wet layer CTG date range<br>† |           | Wet lyr. CTG duration (hrs)‡ | Wet lyr. CTG depth ranges (m) |      | # of piping CTG events• | Piping CTG duration (hrs)‡ | Piping CTG depth ranges (m) |      |
|--------------------|-------------|-------------------------------|-----------|------------------------------|-------------------------------|------|-------------------------|----------------------------|-----------------------------|------|
| Site Averages      | -           | -                             | -         | 263.94                       | 0.67                          | 3.31 | -                       | 45.47                      | 2.42                        | 6.06 |
| H3-1540m           | 2008        | 6/13/2008                     | 7/16/2008 | 198                          | 1                             | 3.25 | 1                       | 19.00                      | 2.00                        | 4.75 |
| H2-1555m           | 2008        | 6/9/2008                      | 7/20/2008 | 253                          | 0.25                          | 5.00 | 1                       | 22.00                      | 4.00                        | 5.25 |
| H1-1680m           | 2008        | 6/14/2008                     | 7/17/2008 | 83                           | 0.50                          | 2.25 | 1                       | 22.50                      | 2.50                        | 5.25 |
| H163-1660m         | 2008        | 6/14/2008                     | 7/12/2008 | 76                           | 0.75                          | 3.00 | 1                       | 12.00                      | 2.25                        | 4.25 |
| H165-1680m         | 2008        | 6/14/2008                     | 8/19/2008 | 56.5                         | 0.50                          | 3.00 | 1                       | 12.50                      | 2.25                        | 5.25 |
| T1-1710m           | 2008        | 6/14/2008                     | 8/4/2008  | 100.5                        | 0.25                          | 3.75 | 1                       | 18.50                      | 2.00                        | 3.75 |
| T2-1750m           | 2007        | 6/28/2007                     | 8/4/2007  | 191.5                        | 0.75                          | 5.00 | 1                       | 96.50                      | 3.50                        | 17.0 |
| T3-1818m           | 2007        | 6/25/2007                     | 8/9/2007  | 86.5                         | 1.50                          | 3.50 | 2                       | 120.50                     | 4.00                        | 5.25 |
| T3-1818m, 15m core | 2022        | 7/5/2022                      | 9/9/2022  | 960                          | 0.13                          | 3.50 | 1                       | 110.00                     | 1.50                        | 4.50 |
| T3-1818m, 25m core | 2022        | 7/6/2022                      | 9/11/2022 | 407.5                        | 0.25                          | 4.50 | 2                       | 42.00                      | 1.75                        | 9.00 |
| T4-1878m           | 2007        | 7/3/2007                      | 8/1/2007  | 268.5                        | 0.75                          | 3.00 | 1                       | 4.50                       | 1.00                        | 9.00 |
| T4-1878m           | 2022        | 7/6/2022                      | 8/5/2022  | 260                          | 0.25                          | 1.25 | 1                       | 3.00                       | 0.75                        | 3.00 |
| T4-1878m           | 2023        | 7/9/2023                      | 7/23/2023 | 155                          | 1.50                          | 3.75 | 1                       | 2.00                       | 5.00                        | 6.00 |
| T5-1928m           | 2023        | 7/10/2023                     | 7/22/2023 | 157.5                        | 0.75                          | 4.00 | 1                       | 190.00                     | 2.25                        | 7.75 |
| CP-1998m           | 2007        | 6/25/2007                     | 7/28/2007 | 603                          | 0.75                          | 2.25 | -                       | -                          | -                           | -    |
| CP-1998m           | 2023        | 7/6/2023                      | 7/18/2023 | 226.5                        | 1.25                          | 2.75 | 1                       | 44.00                      | 2.50                        | 4.75 |
| UP18-2102m         | 2023        | 7/8/2023                      | 7/29/2023 | 504                          | 0.25                          | 2.50 | 1                       | 8.50                       | 1.50                        | 2.25 |

† Date ranges encompass the minimum and maximum dates in which CTGs associated with wet layer onset were observed. CTGs were not necessarily observed continuously over the specified range.  
‡ Temperature gradient durations are the cumulative time in which temperature gradients associated with each scenario were observed within their respective date ranges. Gaps where CTGs were not observed were not included in duration calculations.  
• Observation dates denote the first date in which CTGs associated with breakaway infiltration were observed.

References

Saito, J., Harper, J., and Humphrey, N.: Uptake and Transfer of Heat Within the Firn Layer of Greenland Ice Sheet's Percolation Zone, J Geophys. Res. Earth. Surf., 129, <https://doi.org/10.1029/2024JF007667>, 2024.

McDowell, I. E., Keegan, K. M., Wever, N., Osterberg, E. C., Hawley, R. L., and Marshall, H. P.: Firn Core Evidence of Two-Way Feedback Mechanisms Between Meltwater Infiltration and Firn Microstructure From the Western Percolation Zone of the Greenland Ice Sheet, *J. Geophys. Res. Earth Surf.*, 128, <https://doi.org/10.1029/2022JF006752>, 2023.
